# Supplementary material
Source: Springer Nature journal article supplement (https://www.springermedizin.de/resource/supplementary/12885_2005_526_MOESM3_ESM.pdf/9469686)

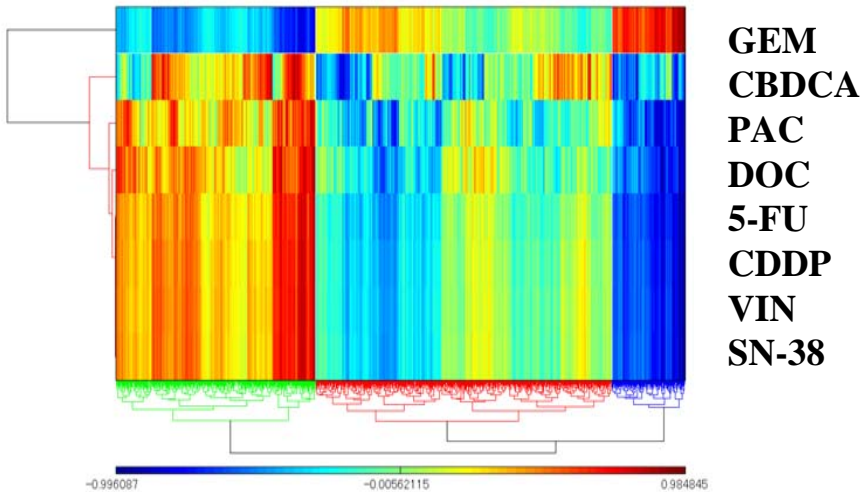

**(A) filter Array Data**

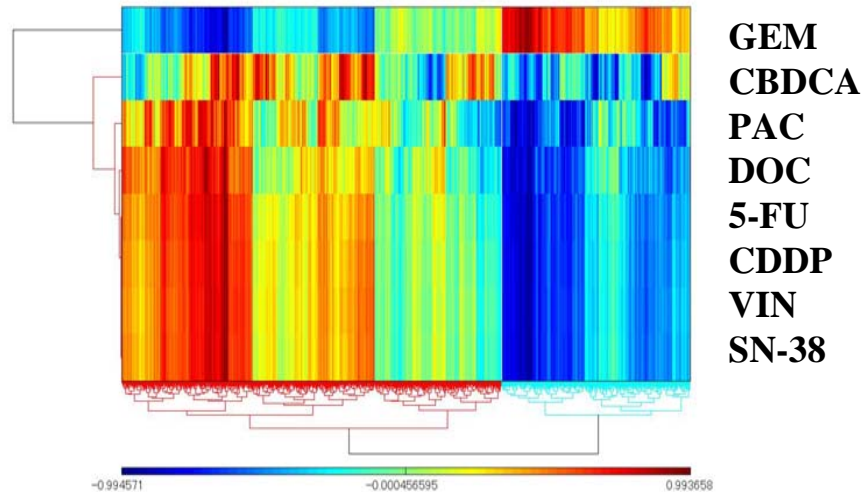

**(B) Affymetrix Data**

Supplement: MOESM3 [file 9469686]
